# Supplementary material for: Exploring Usage of COVID Coach, a Public Mental Health App Designed for the COVID-19 Pandemic: Evaluation of Analytics Data
Source: PubMed Central journal article supplement (PMC7924218; doi:10.2196/26559), 2021-03-01

# COVID Coach Home Screen

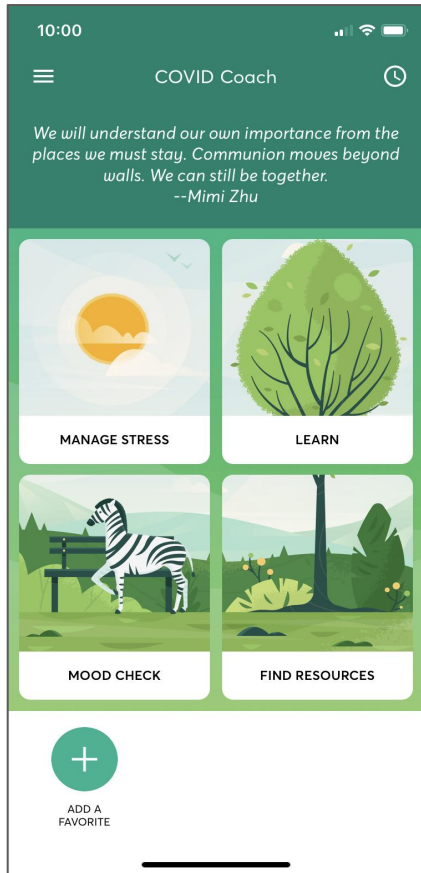

# Manage Stress Overview

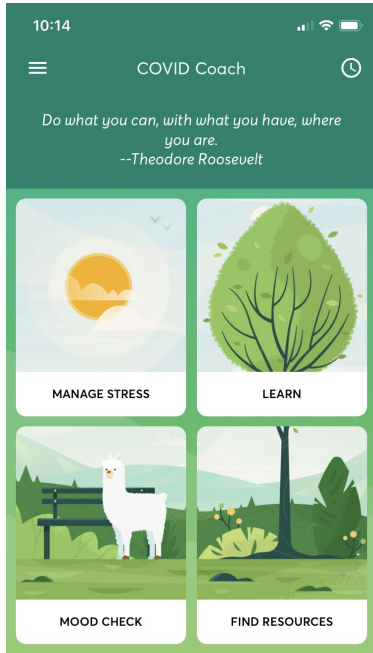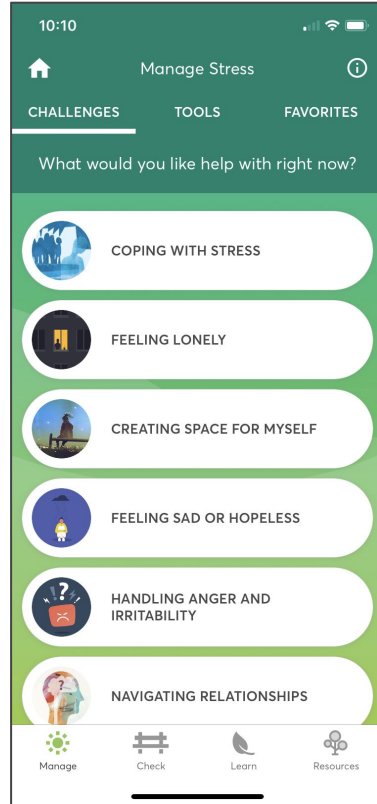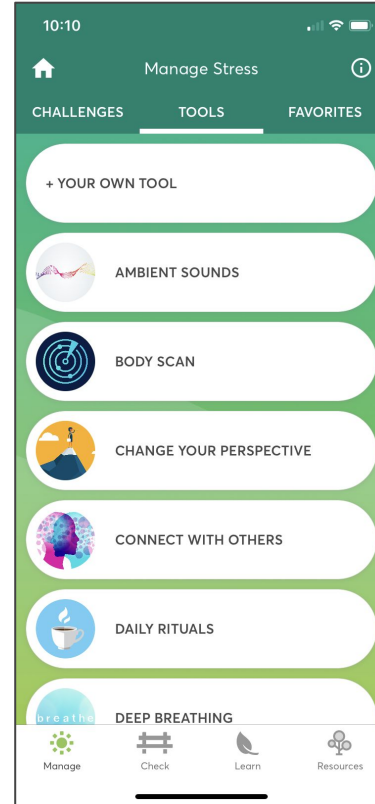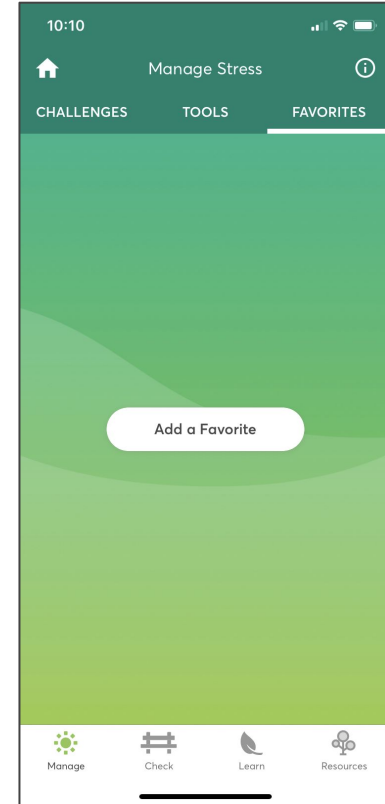

# Manage Stress: Coping Tool Example 1

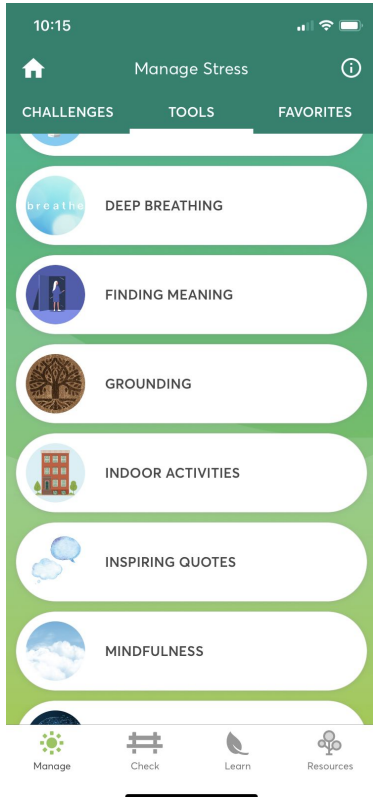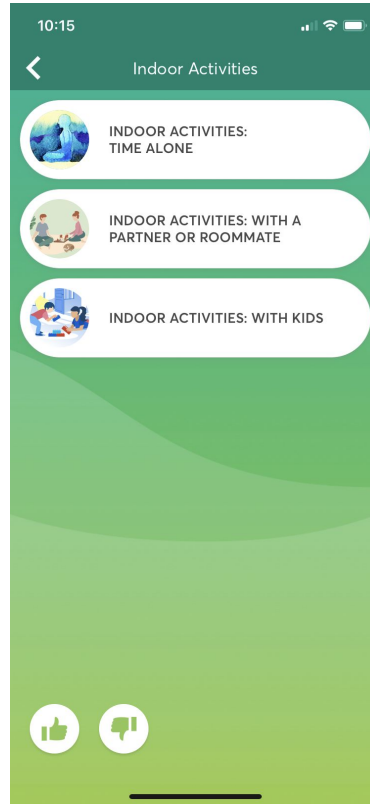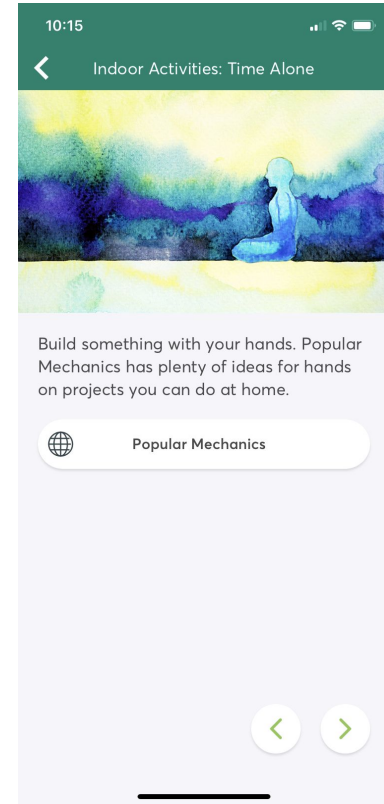

# Manage Stress: Coping Tool Example 2

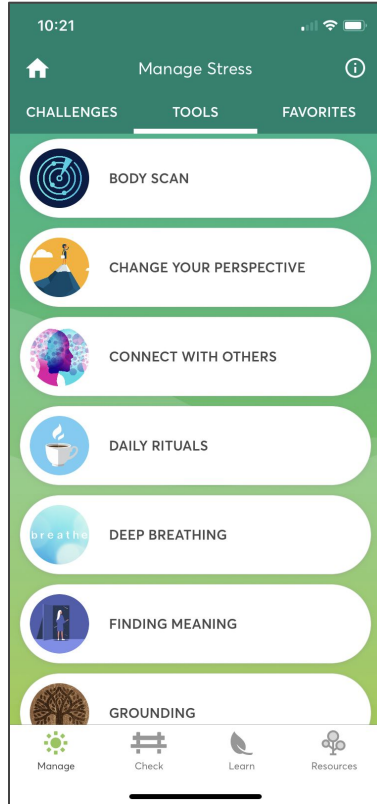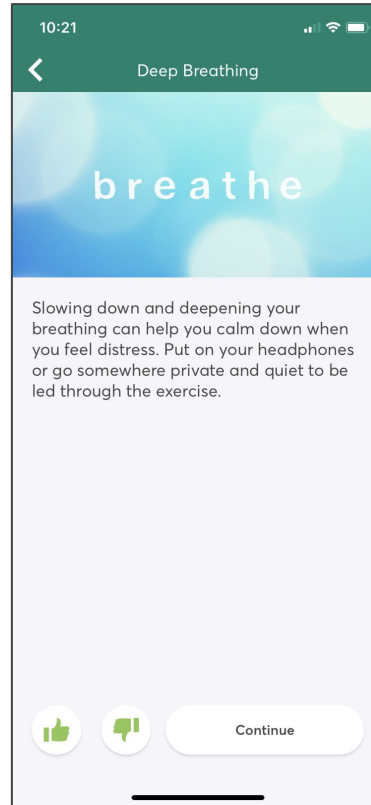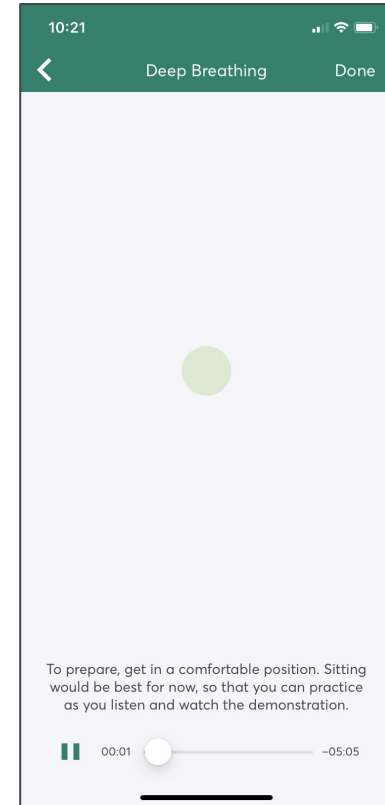

# Learn Overview

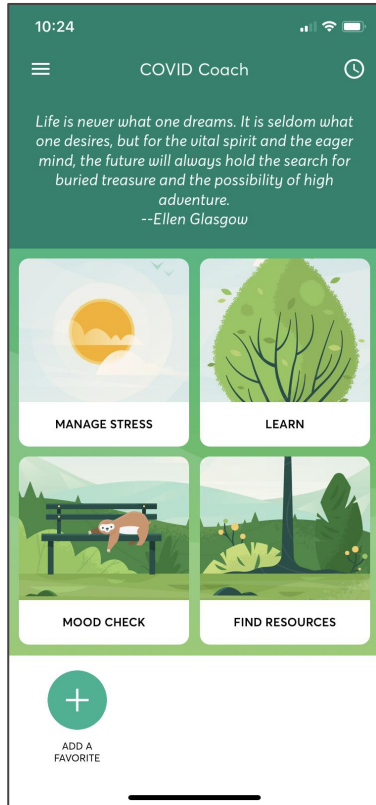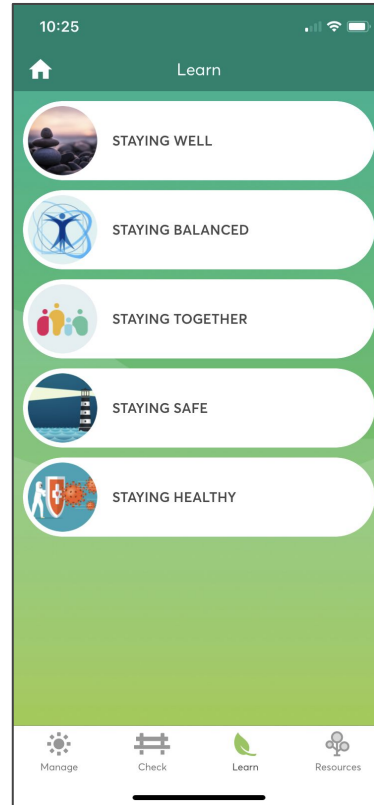

# Learn > Sub-sections

10:33

Staying Well

-  PRIORITIZING YOURSELF, RIGHT NOW
-  WHAT TO EXPECT
-  MANAGING IRRITABILITY
-  FINDING HUMOR
-  FINDING CALM
-  DEALING WITH LONELINESS
-  HARNESSING FRUSTRATION

Manage Check Learn Resources

10:34

Staying Balanced

-  SLEEP
-  STUCK AT HOME?
-  GO EASY ON YOURSELF
-  DO WHAT YOU CAN
-  STICK UP FOR YOURSELF
-  BEING A SMALL BUSINESS OWNER
-  COPING WITH JOB CHANGES

Manage Check Learn Resources

10:34

Staying Together

-  NOTICE THE POSITIVE
-  FIGHT FAIRLY
-  TAKE A TIME OUT
-  FIND A (VIRTUAL) COUPLES THERAPIST
-  HELP TODDLERS AND PRESCHOOLERS
-  HELP YOUNG CHILDREN
-  HELP TEENAGERS

Manage Check Learn Resources

10:34

Staying Safe

-  STAYING SAFE IN A RELATIONSHIP
-  PROTECTING CHILDREN
-  LIMITING DRINKING OR DRUG USE
-  RECOGNIZING WARNING SIGNS OF SUICIDE
-  FACING XENOPHOBIA & RACISM

Manage Check Learn Resources

10:34

Staying Healthy

-  HOW TO PROTECT YOURSELF
-  HANDWASHING 101
-  HANDWASH LIKE A PRO
-  DISINFECTING
-  PHYSICAL DISTANCING
-  NOT TOUCHING YOUR FACE
-  IF YOU GET SICK

Manage Check Learn Resources

# Mood Check Overview

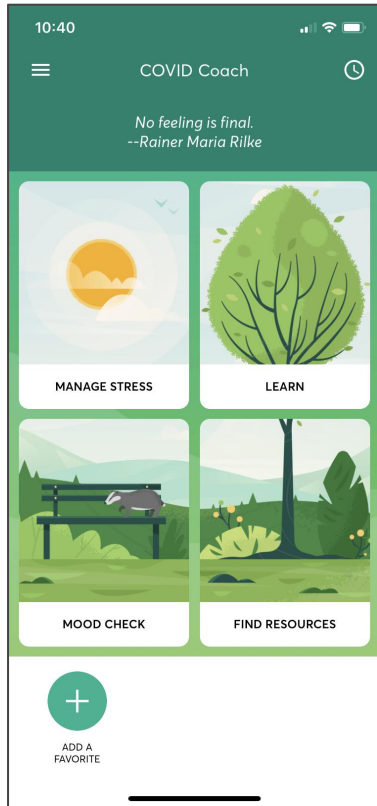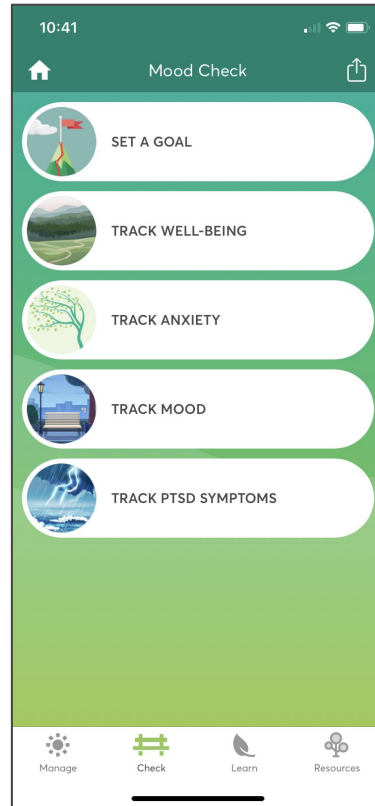

# Mood Check: Set A Goal

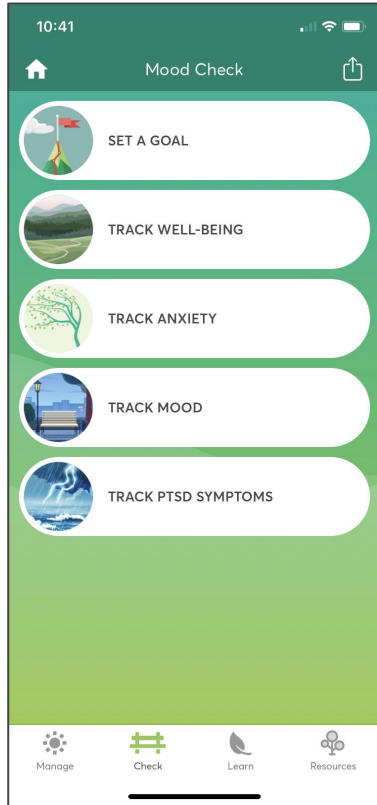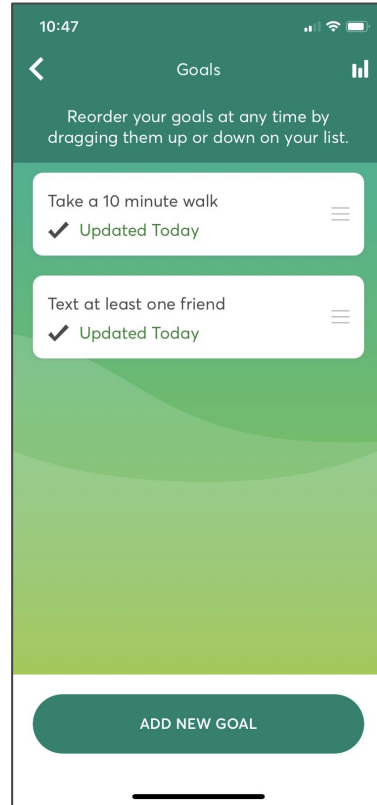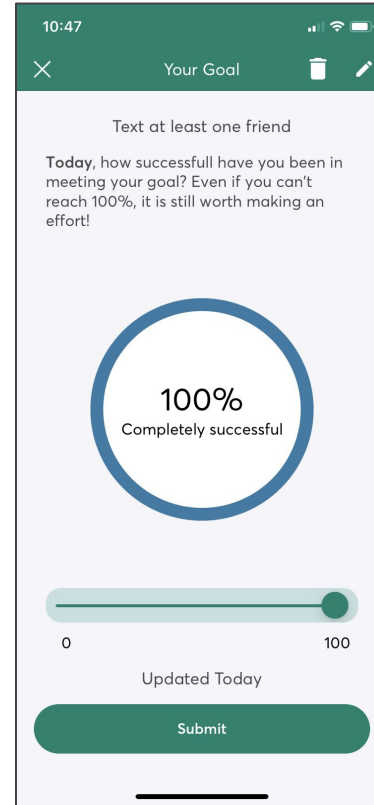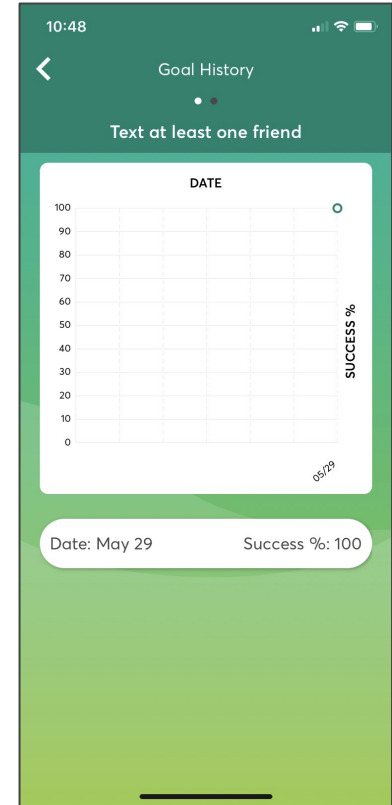



# Mood Check: Track Well-Being (WEMBWS)

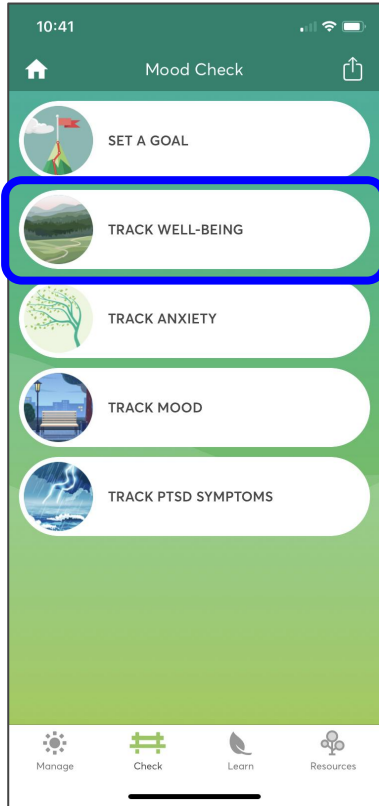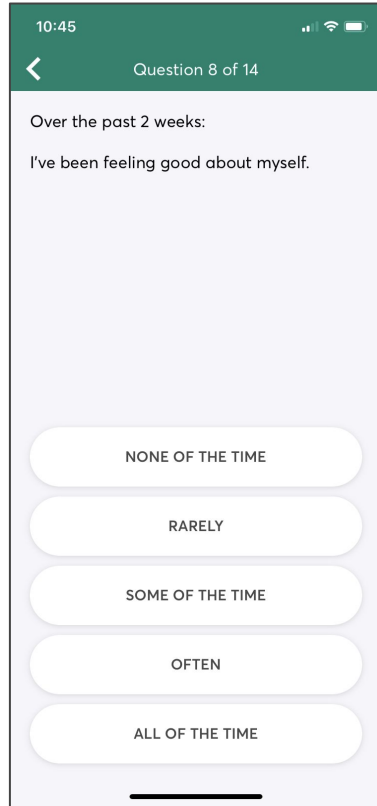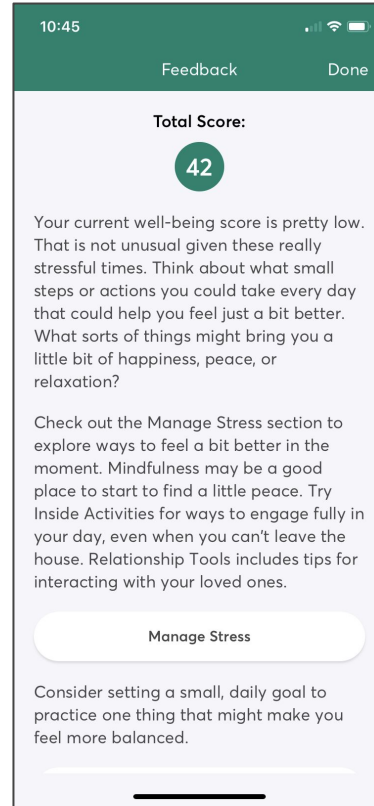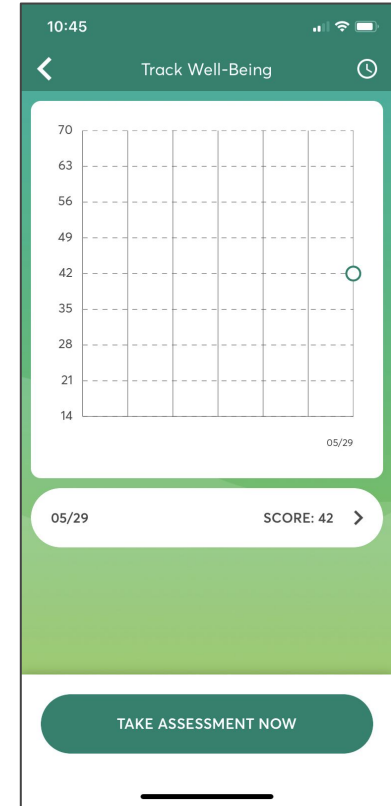

# Find Resources Overview

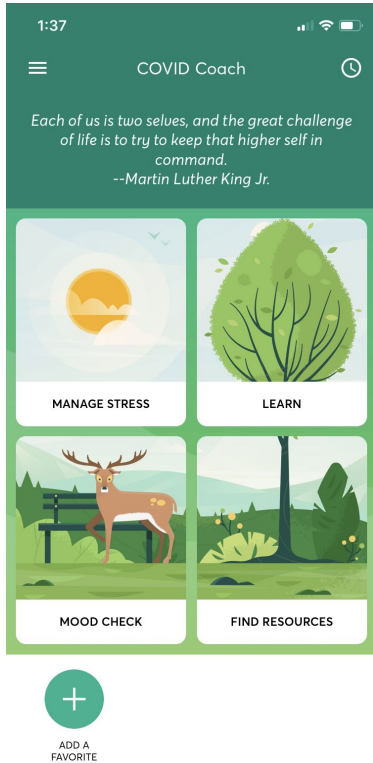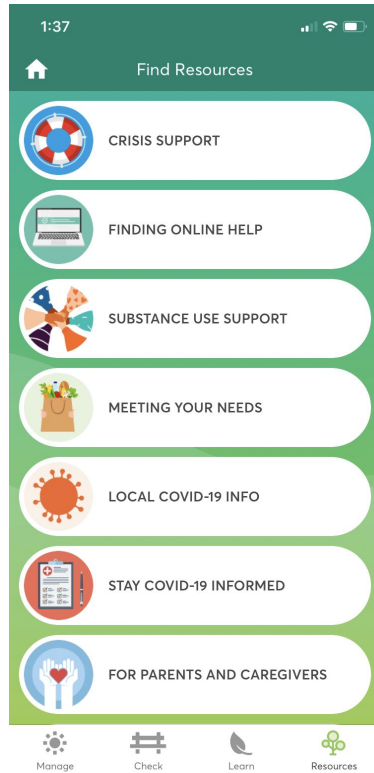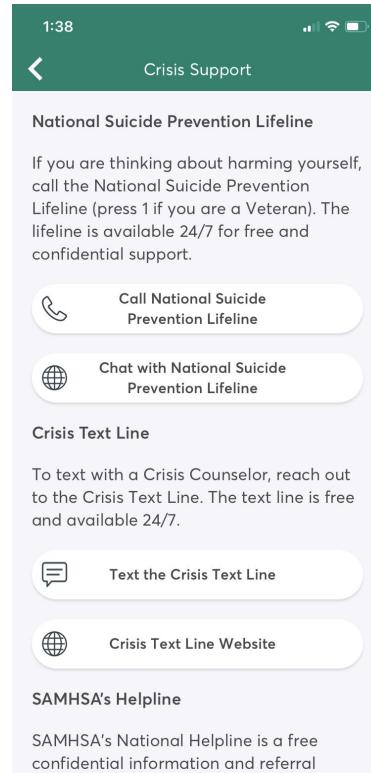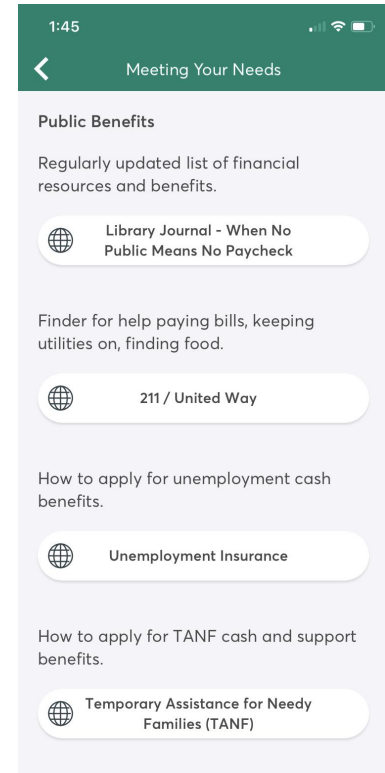

Supplement: jmir_v23i3e26559_app1.pdf [file jmir_v23i3e26559_app1.pdf]
